# Supplementary material
Source: HighWire-hosted journal article supplement (https://openres.ersjournals.com/content/8/4/00303-2022)
Supplement: inline-supplementary-material-1 [file inline-supplementary-material-1.pdf]

#### 4. Supplementary Materials

**Supplemental Table 1.** Primary cardiac pathologies in the cohort and cases of overlap with primary lung pathologies and concurrent cardiac pathologies.

| Cardiac Pathology                      | n  | Associated Primary Lung Phenotypes |      |         |    | Overlapping Cardiac Pathology               |
|----------------------------------------|----|------------------------------------|------|---------|----|---------------------------------------------|
|                                        |    | DAD                                | BRON | PO-PACF | PE |                                             |
| Normal Heart                           | 13 | 7                                  | 3    | 2       | 1  |                                             |
| Hypertrophic/<br>cardiomegalic (>500g) | 12 | 9                                  | 1    | 2       | 0  | Severe atheroma (2), aortic<br>stenosis (1) |
| Severe atheromatosis                   | 10 | 4                                  | 3    | 3       | 0  | Thrombi (3), cardiomegalic (2)              |
| Aortic stenosis                        | 2  | 1                                  | 1    | 0       | 0  | Cardiomegalic (1)                           |
| Amyloidosis                            | 2  | 1                                  | 1    | 0       | 0  |                                             |
| Cardiac Thrombi                        | 4  | 1                                  | 1    | 2       | 0  | Severe atheroma (3)                         |
